# Supplementary material for: Limited versus Radical Resection in Mitral Valve Infective Endocarditis Surgery
Source: MDPI journal article supplement (doi:10.3390/jcdd10040146), 2023-03-30
Supplement: s1 [file s1]

# Supplementary Table

**Table S1.** Baseline characteristics of the unmatched (n=114) population.

| Variables                              | Limited-resection<br>n=63 | Radical-resection<br>n=51 | <i>p</i> |
|----------------------------------------|---------------------------|---------------------------|----------|
| <b>Demographics</b>                    |                           |                           |          |
| Age, years±SD                          | 60±13                     | 62±13                     | 0.437    |
| Gender, female, <i>n</i> (%)           | 22 (35)                   | 18 (35)                   | 0.967    |
| Diabetes, <i>n</i> (%)                 | 11 (17)                   | 14 (27)                   | 0.200    |
| Drug abuse, <i>n</i> (%)               | 5 (8)                     | 2 (4)                     | 0.475    |
| Previous stroke, <i>n</i> (%)          | 27 (43)                   | 18 (35)                   | 0.411    |
| - endocarditis related, <i>n</i> (%)   | 25 (40)                   | 17 (33)                   | 0.485    |
| - neurologic dysfunction, <i>n</i> (%) | 20 (32)                   | 14 (27)                   | 0.618    |
| CAD, <i>n</i> (%)                      | 13 (21)                   | 14 (27)                   | 0.395    |
| Atrial fibrillation, <i>n</i> (%)      | 15 (24)                   | 14 (27)                   | 0.657    |
| Pulmonary disease, <i>n</i> (%)        | 7 (11)                    | 7 (14)                    | 0.672    |
| Dialysis, <i>n</i> (%)                 | 5 (8)                     | 8 (16)                    | 0.196    |
| Liver disease, <i>n</i> (%)            | 5 (8)                     | 3 (6)                     | 0.730    |
| PVD, <i>n</i> (%)                      | 7 (11)                    | 10 (20)                   | 0.205    |
| Previous CABG, <i>n</i> (%)            | 3 (5)                     | 3 (6)                     | >0.999   |
| Previous PCI, <i>n</i> (%)             | 3 (5)                     | 3 (6)                     | >0.99    |
| Previous valve surgery, <i>n</i> (%)   | 3 (5)                     | 6 (12)                    | 0.295    |
| EuroSCORE II, mean±SEM                 | 8.03±1.35                 | 15.16±2.20                | 0.007    |
| <b>Clinical status</b>                 |                           |                           |          |
| NYHA fc III-IV, <i>n</i> (%)           | 29 (56)                   | 27 (53)                   | 0.463    |
| Intubated, <i>n</i> (%)                | 5 (8)                     | 8 (16)                    | 0.196    |
| Vasopressor need, <i>n</i> (%)         | 5 (8)                     | 9 (18)                    | 0.116    |
| Surgical delay, days±SD                | 15±12                     | 15±17                     | 0.989    |
| <b>Inflammatory status</b>             |                           |                           |          |
| CRP, mg/dL (IQR)                       | 4.5 (1.8-9.8)             | 6.9 (2.2-10.0)            | 0.429    |
| PCT, ng/ml (IQR)                       | 0.17 (0.05-0.32)          | 0.42 (0.16-0.82)          | 0.071    |
| WBC, 10 <sup>9</sup> /L (IQR)          | 8.35 (6.27-11.75)         | 9.83 (7.47-13.75)         | 0.235    |
| <b>Echocardiographic parameters</b>    |                           |                           |          |
| LVEF >50%, <i>n</i> (%)                | 53 (84)                   | 43 (84)                   | 0.978    |
| Severe MR, <i>n</i> (%)                | 37 (59)                   | 37 (73)                   | 0.124    |
| Concomitant AV IE, <i>n</i> (%)        | 10 (16)                   | 13 (25)                   | 0.203    |
| Concomitant TV IE, <i>n</i> (%)        | 7 (11)                    | 2 (4)                     | 0.184    |

Data are presented as mean±SD, median (interquartile range) or number (percentage); BMI, body mass index; CAD, coronary artery disease; PVD, peripheral artery disease; CABG, coronary artery bypass grafting; PCI, percutaneous coronary intervention; EuroSCORE, European System for Cardiac Operative Risk Evaluation; NYHA fc, New York Heart Association functional classification; CRP, c-reactive protein; PCT, procalcitonin; WBC, white blood count; LVEF, left ventricular ejection fraction; MR, mitral regurgitation; AV, aortic valve; TV, tricuspid valve; IE, infective endocarditis. SD, standard deviation; IQR, interquartile range.
